# Supplementary material for: Identification of Methylation Immune Subtypes and Establishment of a Prognostic Signature for Gliomas Using Immune-Related Genes
Source: PubMed Central journal article supplement (PMC8600480; doi:10.3389/fimmu.2021.737650), 2021-11-04

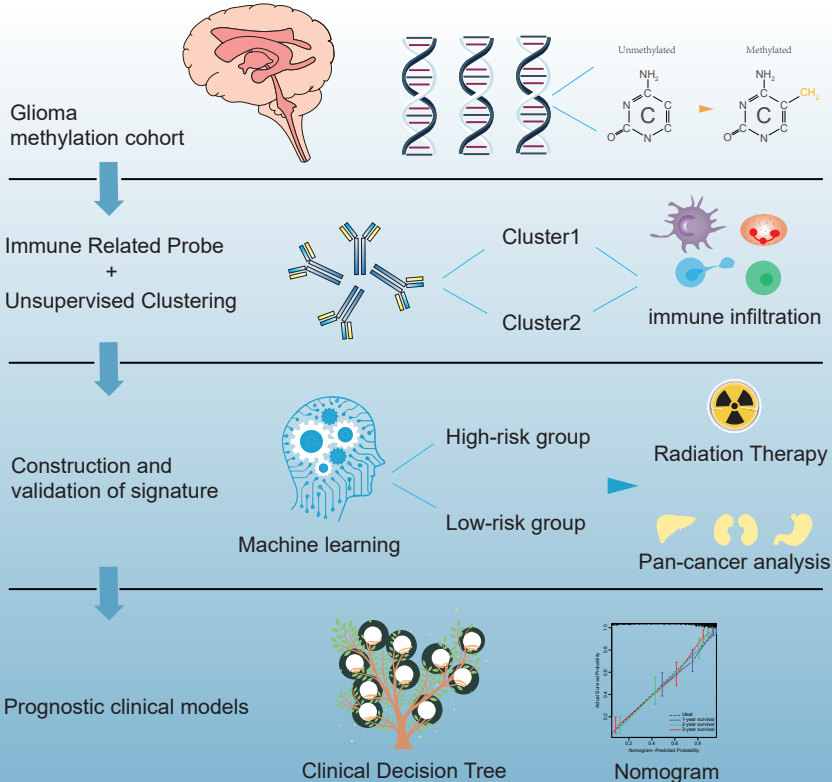

Supplement: DataSheet_2.pdf [file DataSheet_2.pdf]
